# Supplementary material for: Photoremoval of Bisphenol A Using Hierarchical Zeolites and Diatom Biosilica
Source: MDPI journal article supplement (doi:10.3390/ijms24032878), 2023-02-02
Supplement: s1 [file s1]

SUPPLEMENTARY MATERIALS

# Photoremoval of Bisphenol a Using Hierarchical Zeolites and Diatom Biosilica

Jagoda Chudzińska <sup>1</sup>, Bartosz Woźniak <sup>1</sup>, Myroslav Sprynskyy <sup>2</sup>, Izabela Nowak <sup>1</sup> and Agnieszka Feliczak-Guzik <sup>1,\*</sup>

<sup>1</sup> Faculty of Chemistry, Adam Mickiewicz University in Poznań, Uniwersytetu Poznańskiego 8, 61-614 Poznań, Poland;

<sup>2</sup> Faculty of Chemistry, Nicolaus Copernicus University in Toruń, 7 Gagarina Str., 87-100 Toruń, Poland

\* Correspondence: agaguzik@amu.edu.pl; Tel.: +48-618-291-747

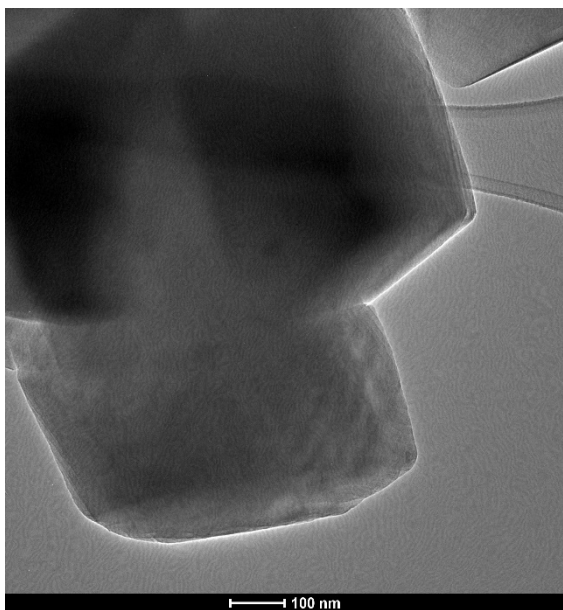

**Commercial zeolite (FAU)**

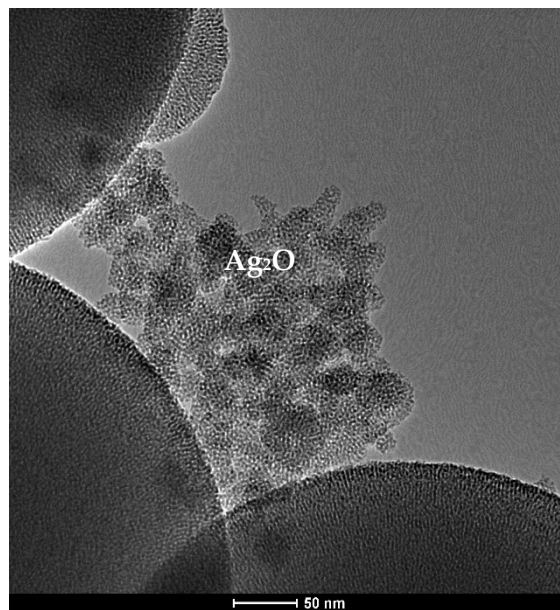

**Zeolite FAU\_CTABr\_3%AgNO<sub>3</sub>**

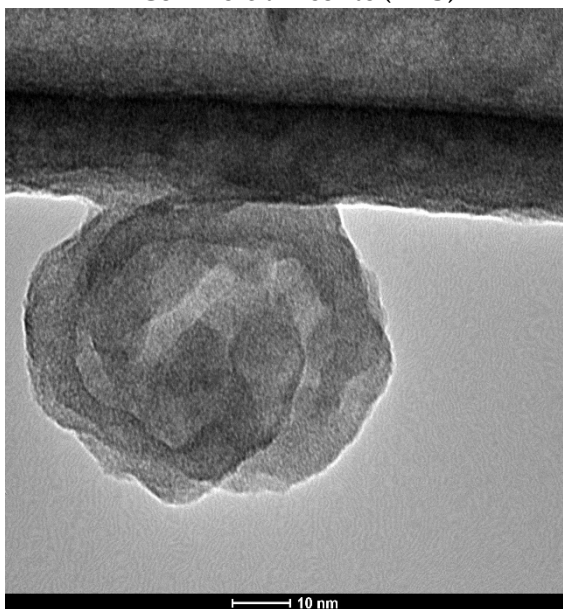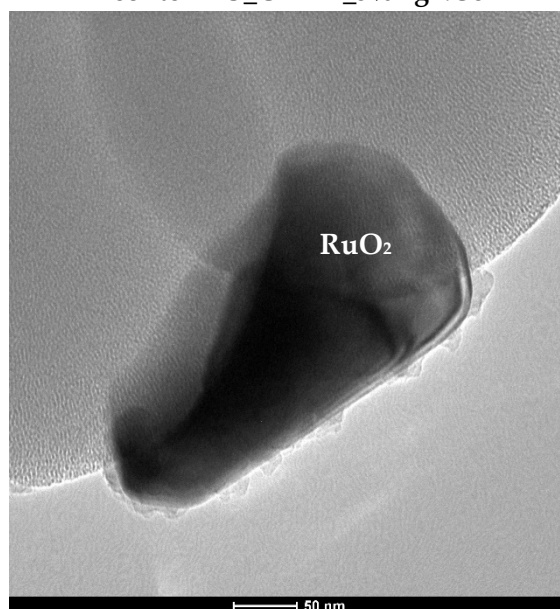

**Zeolite FAU\_CTABr\_Ru**

**Figure S1.** Transmission electron microscopy (TEM) images.

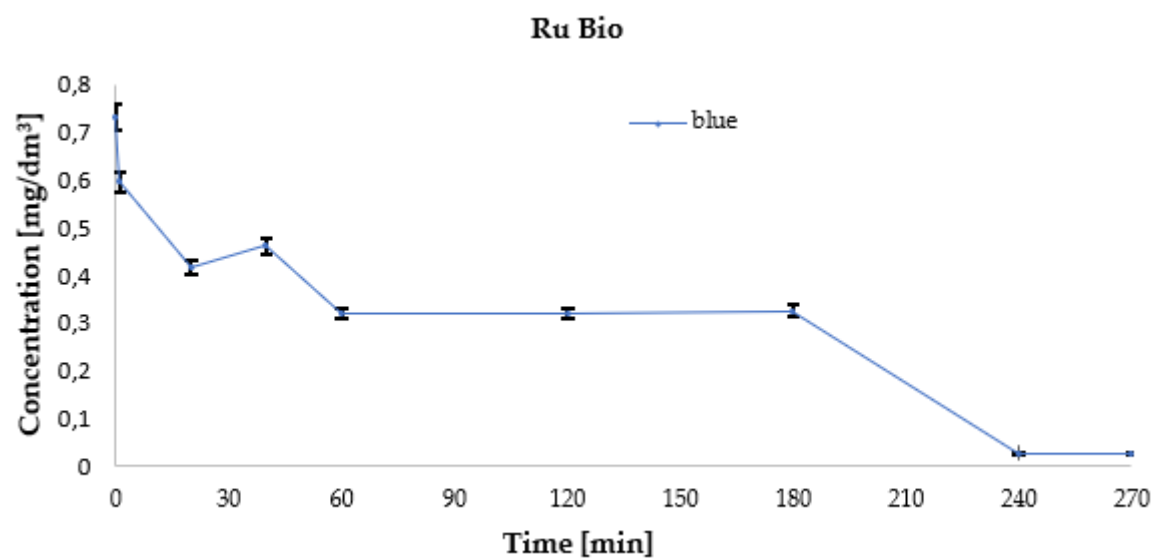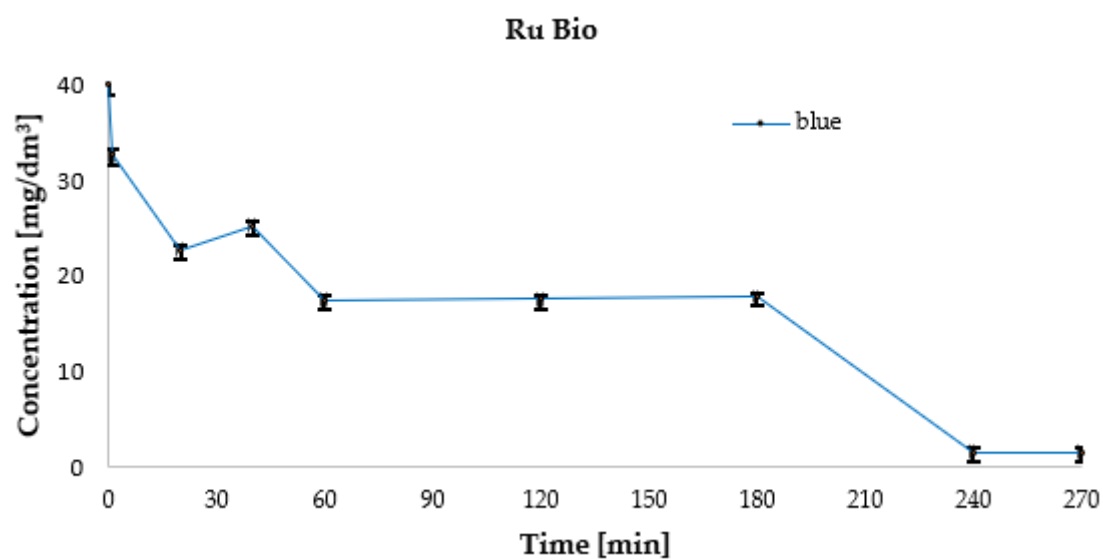

**Figure S2.** Time dependence of absorbance/concentration for 40 mg/dm<sup>3</sup> bisphenol A solutions under blue light irradiation at 25 °C, pH 7 in the presence of ruthenium ion- modified biosilica.

## Photocatalytic removal of bisphenol A using a hierarchical zeolite based on FAU-type commercial zeolite modified with ruthenium ions

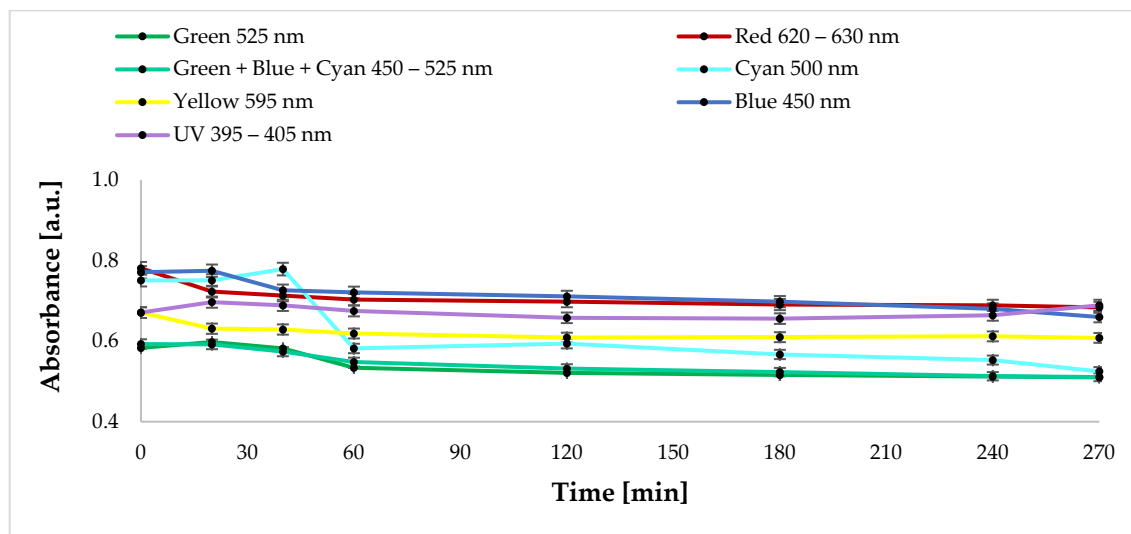

**Figure S3.** Time dependence of absorbance for 40 mg/dm<sup>3</sup> bisphenol A solutions under light irradiation at 25 °C, pH 7 using a hierarchical zeolite based on FAU-type commercial zeolite modified with ruthenium ions.

## Photocatalytic removal of bisphenol A using a hierarchical zeolite based on FAU-type commercial zeolite modified with silver ions

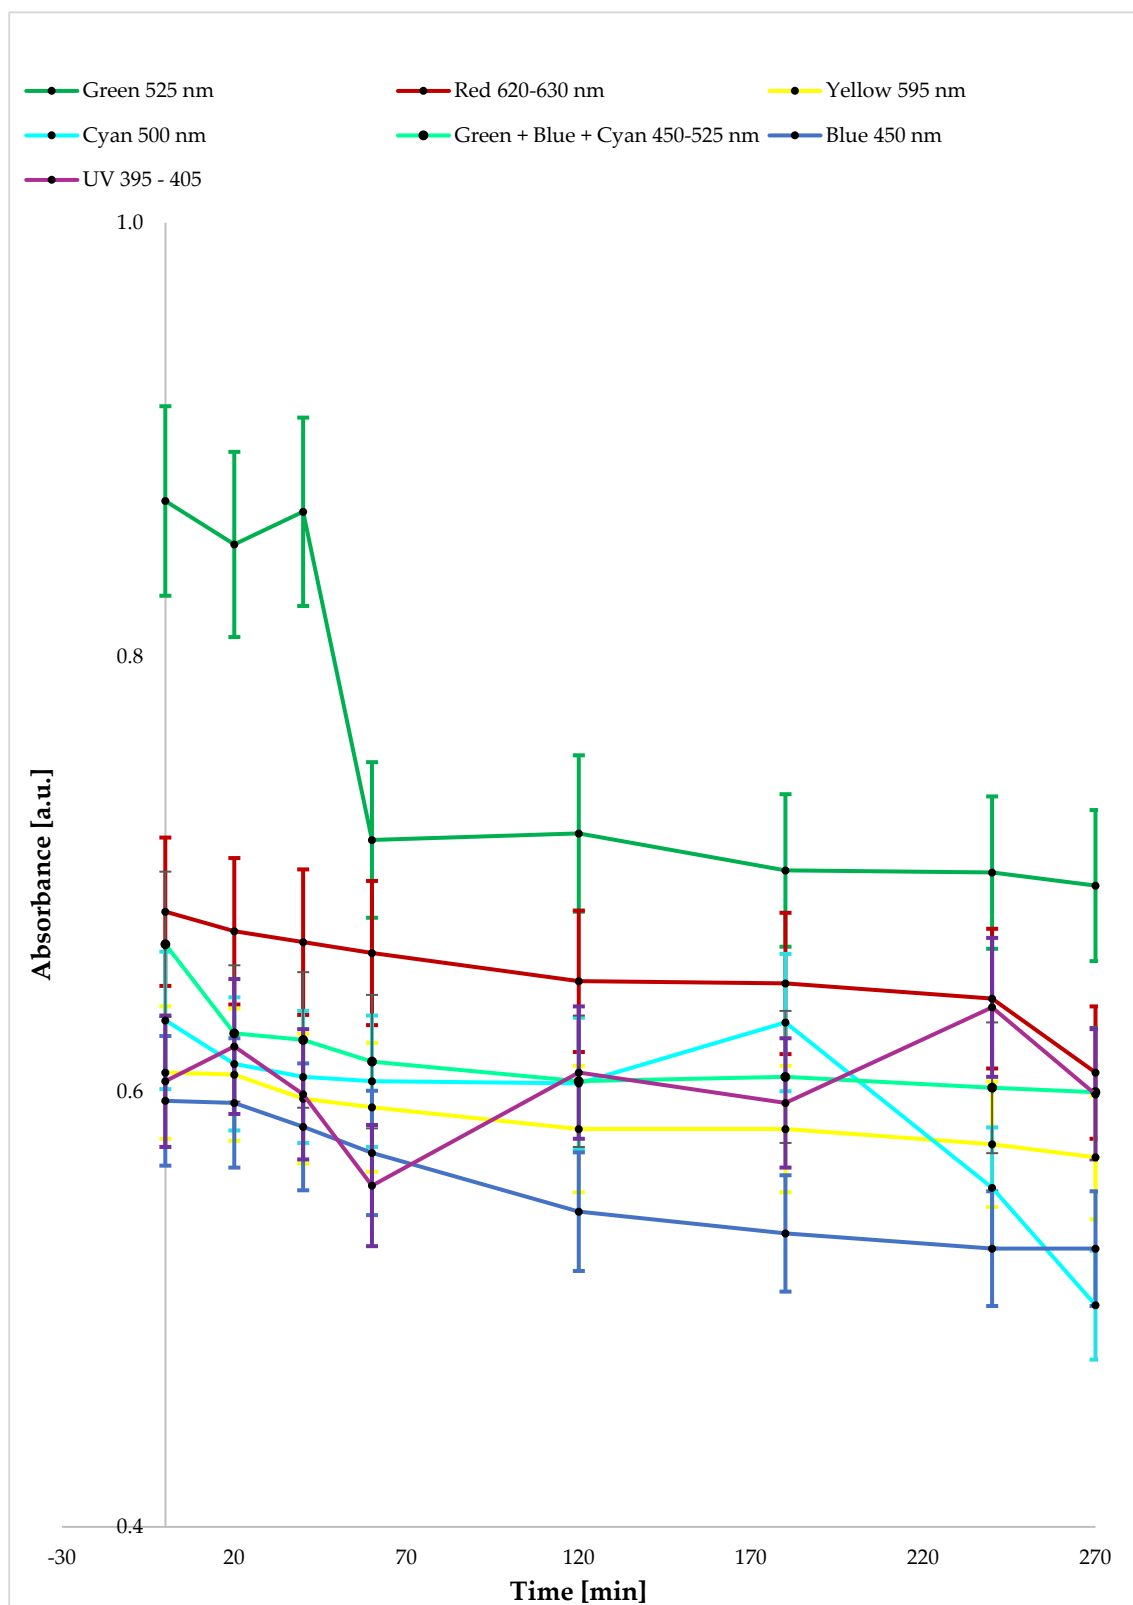

**Figure S4.** Time dependence of absorbance for 40 mg/dm<sup>3</sup> bisphenol A solutions under light irradiation at 25 °C, pH 7 using a hierarchical zeolite based on FAU-type commercial zeolite modified with silver ions.

## Photocatalytic removal of bisphenol A using biosilica modified with ruthenium ions

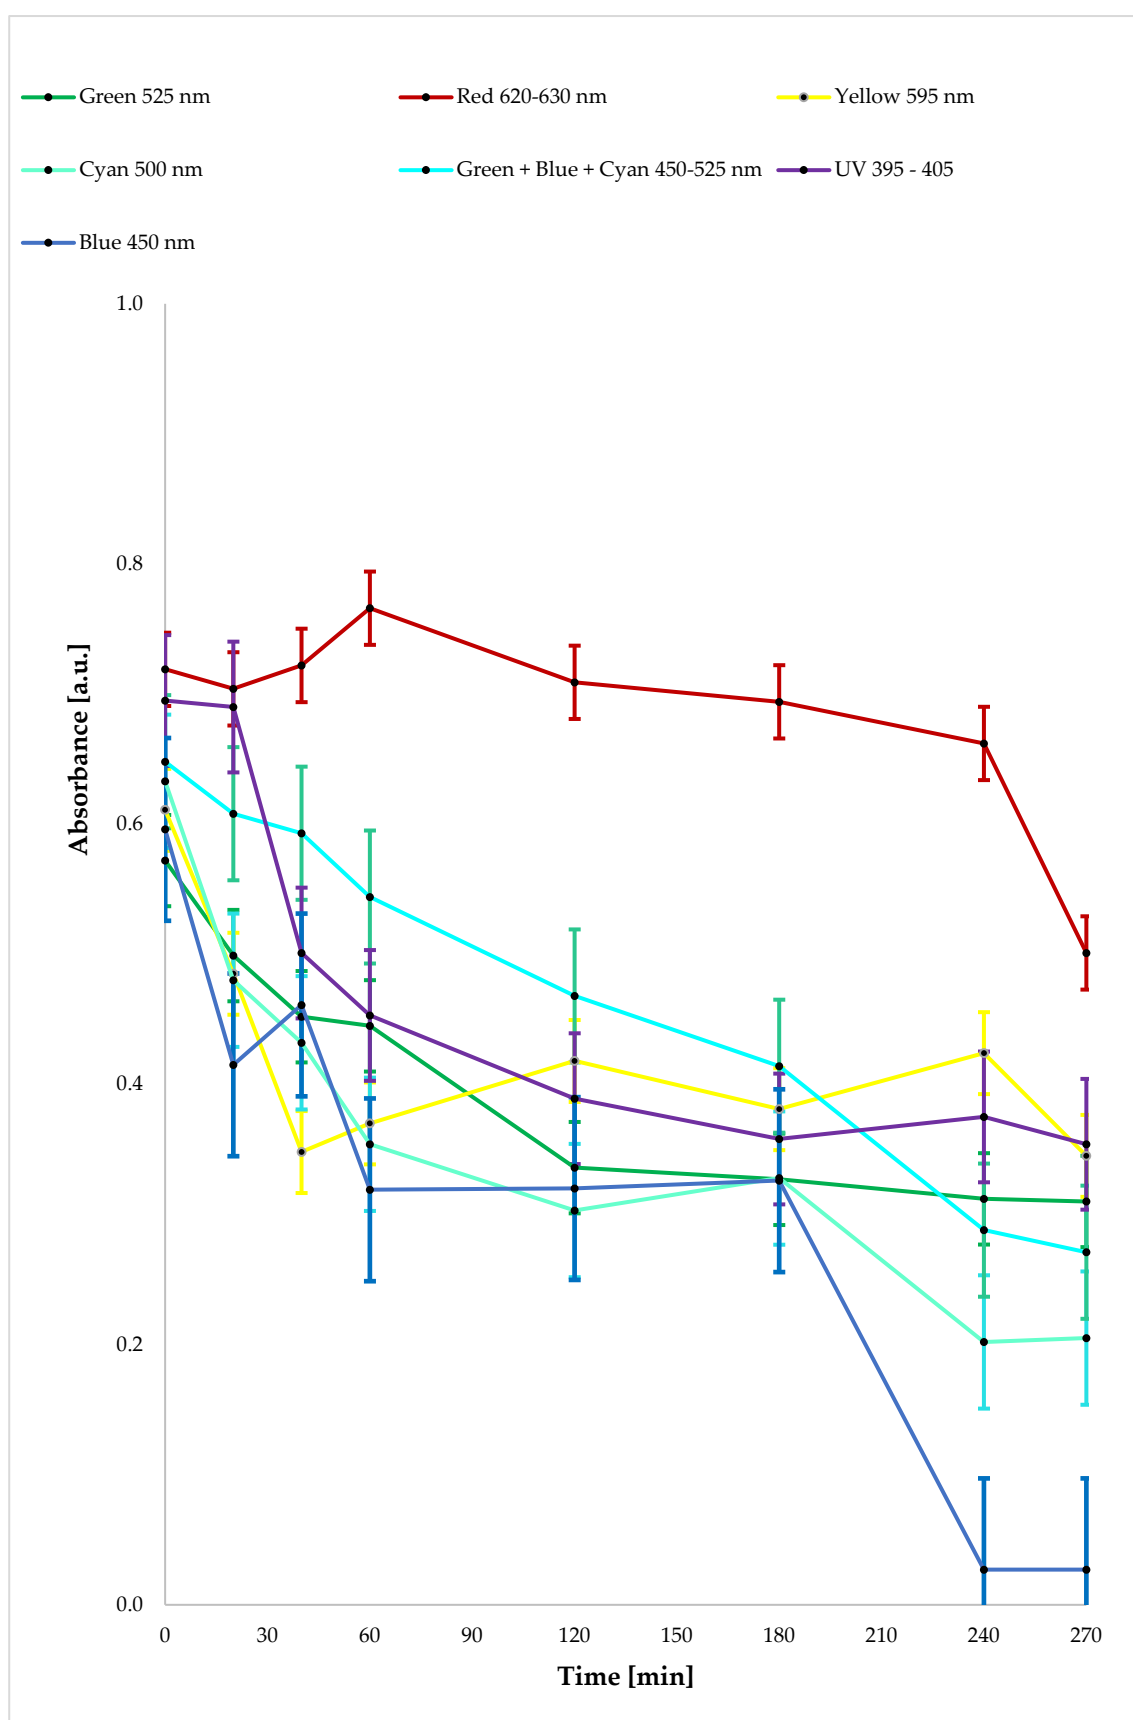

**Figure S5.** Time dependence of absorbance for 40 mg/dm<sup>3</sup> bisphenol A solutions under light irradiation at 25 °C, pH 7 using biosilica modified with ruthenium ions.

## Photocatalytic removal of bisphenol A using biosilica modified with silver ions

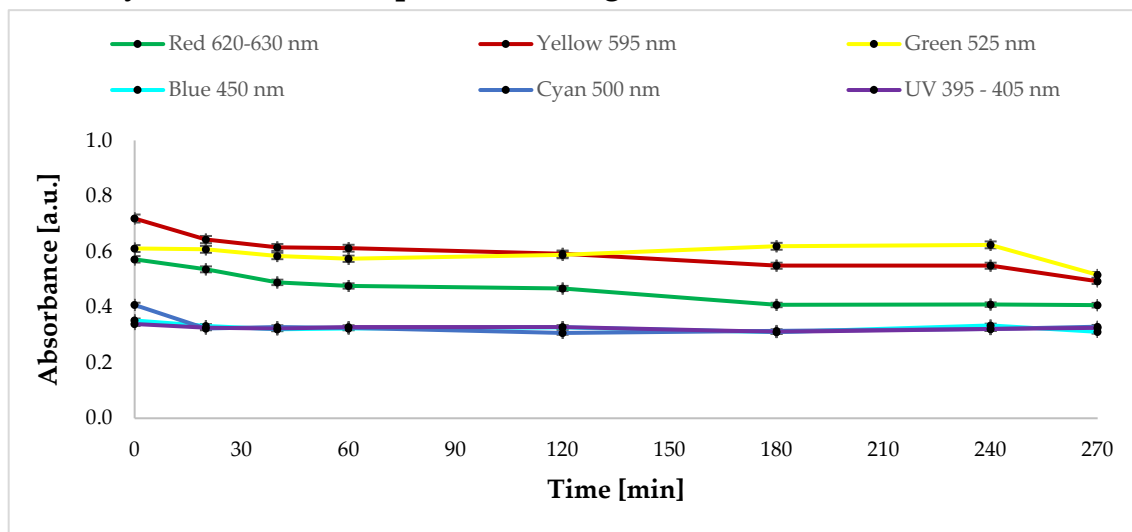

**Figure S6.** Time dependence of absorbance for 40 mg/dm<sup>3</sup> bisphenol A solutions under light irradiation at 25 °C, pH 7 using biosilica modified with silver ions.

## Photocatalytic removal of bisphenol A using biosilica (bio-SiO<sub>2</sub>)

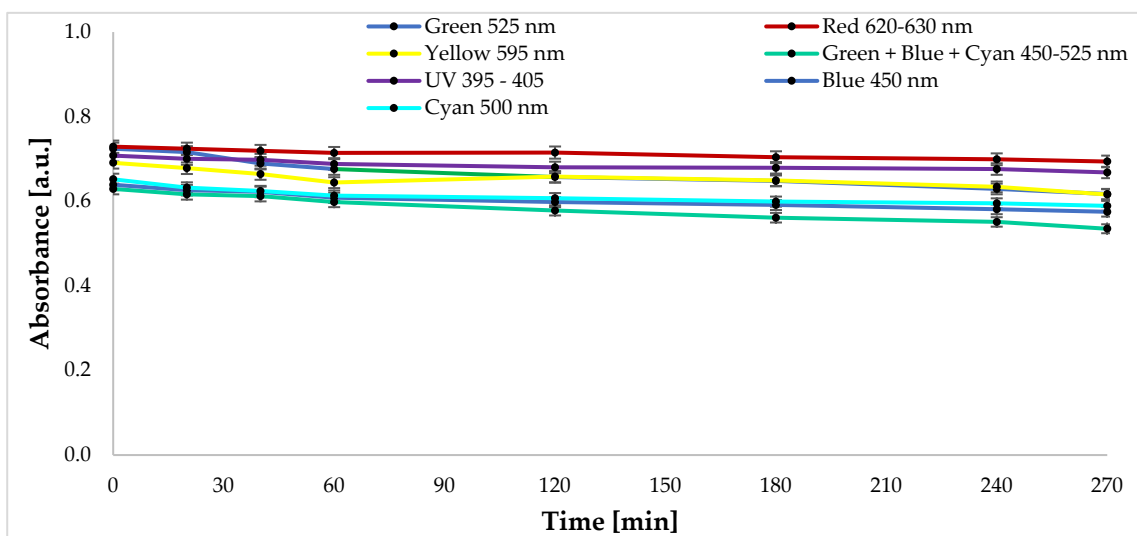

**Figure S7.** Time dependence of absorbance for 40 mg/dm<sup>3</sup> bisphenol A solutions under blue light irradiation at 25 °C, pH 7 using biosilica.

### Photocatalytic removal of bisphenol A using commercial zeolite - FAU

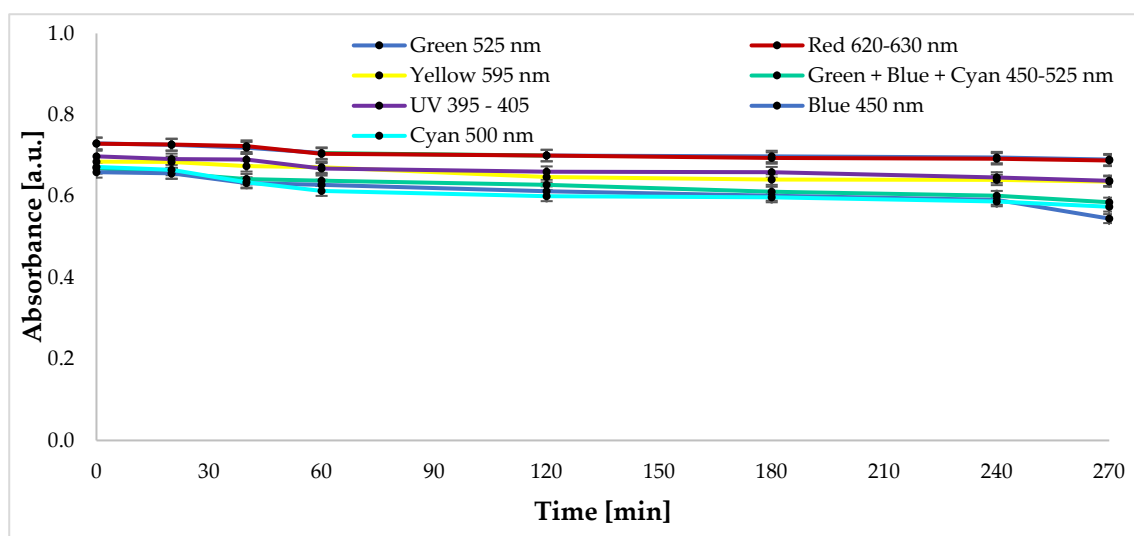

**Figure S8.** Time dependence of absorbance for 40 mg/dm<sup>3</sup> bisphenol A solutions under light irradiation at 25 °C, pH 7 using commercial zeolite – FAU.

### Photocatalytic removal of bisphenol A without catalyst - blank

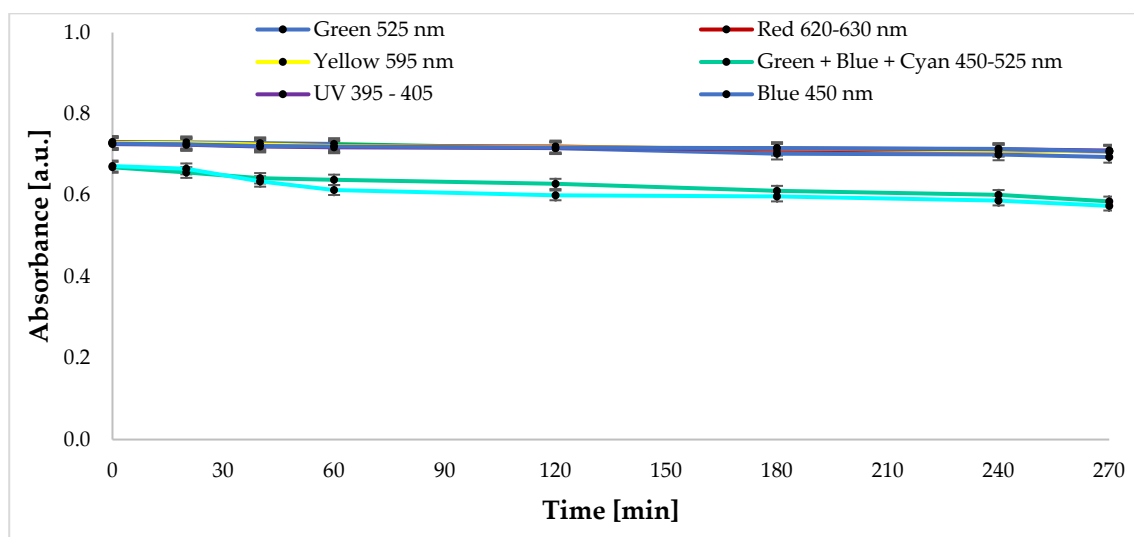

**Figure S9.** Time dependence of absorbance for 40 mg/dm<sup>3</sup> bisphenol A solutions under blue light irradiation at 25 °C, pH 7 without catalyst (blank).



## Leaching tests

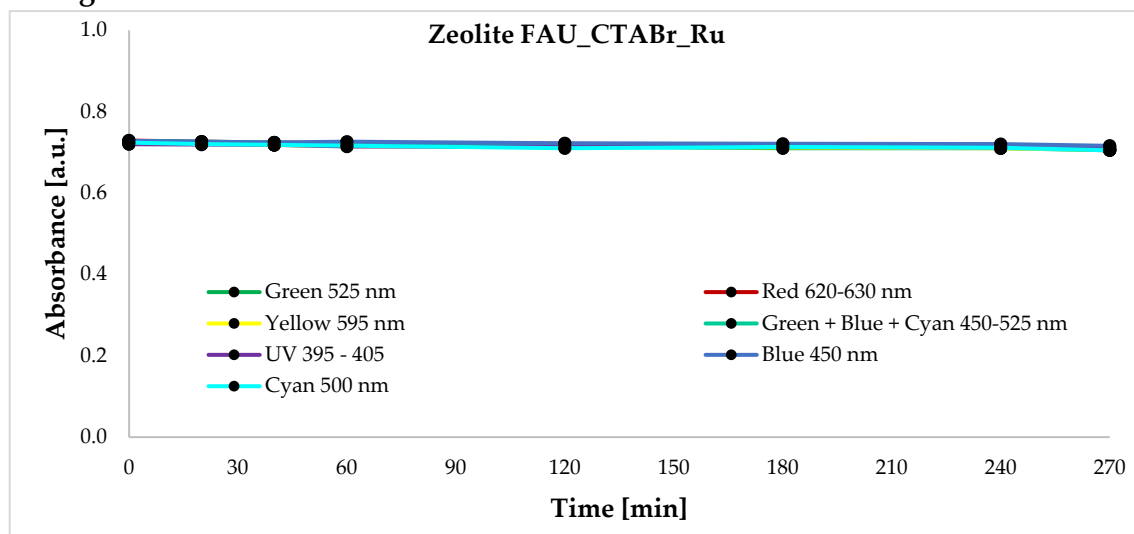

**Figure S10.** Leaching test – Zeolite FAU\_CTABr\_Ru; T = 25 °C; pH 7.

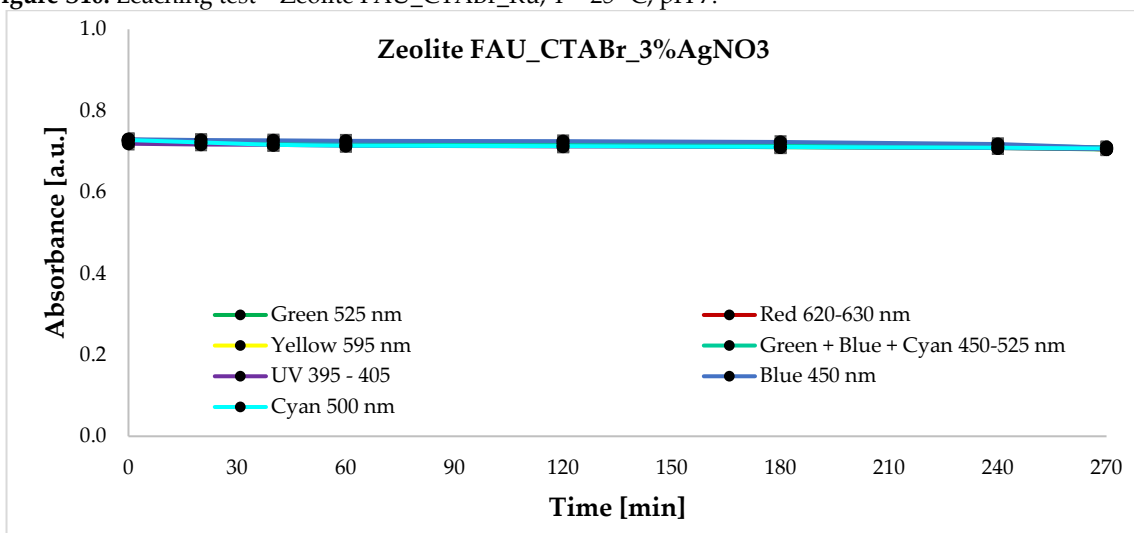

**Figure S11.** Leaching test – Zeolite FAU\_CTABr\_3%AgNO<sub>3</sub>; T = 25 °C; pH 7.

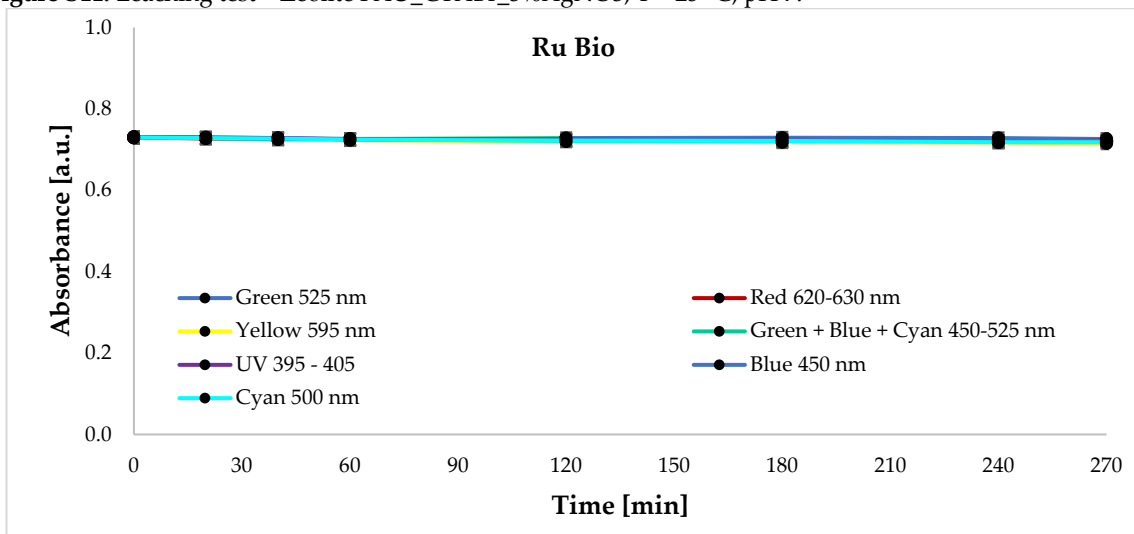

**Figure S12.** Leaching test – Ru Bio; T = 25 °C; pH 7.

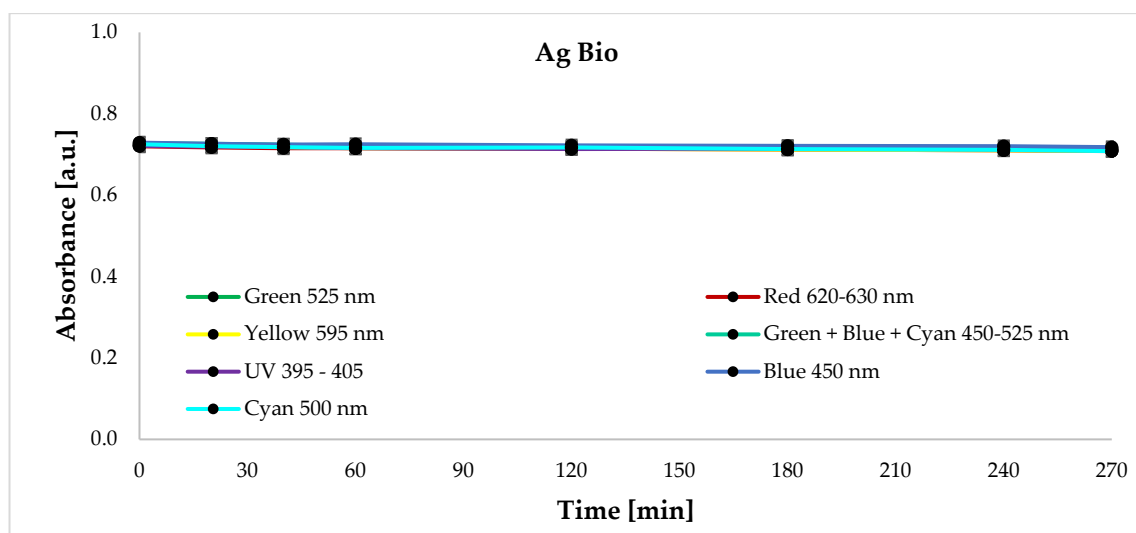

**Figure S13.** Leaching test – Ag Bio; T = 25 °C; pH 7.

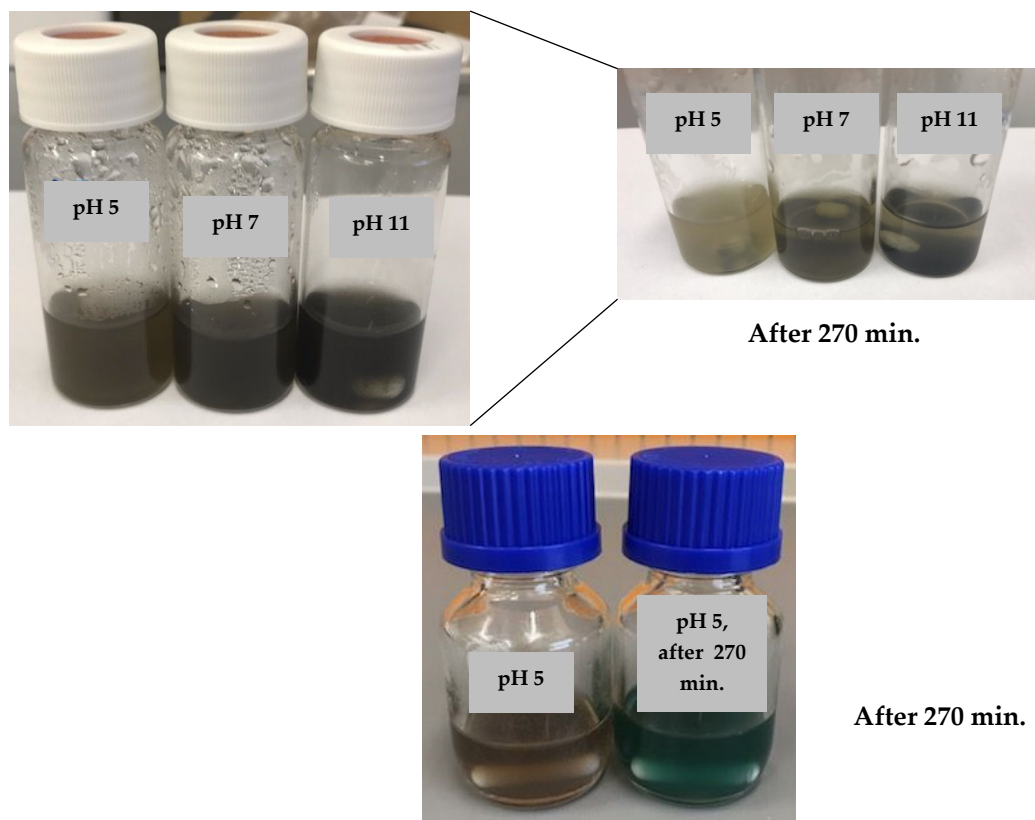

**Figure S14.** Effect pH on the photocatalytic **removal** of bisphenol A for ruthenium ion-modified diatom biosilica - Color change of bisphenol solution over time (T = 25 °C; green+blue+cyan light irradiation, at different solution pH values).

# STAGE 1

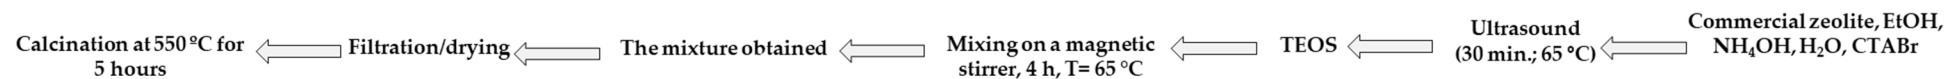

# STAGE 2

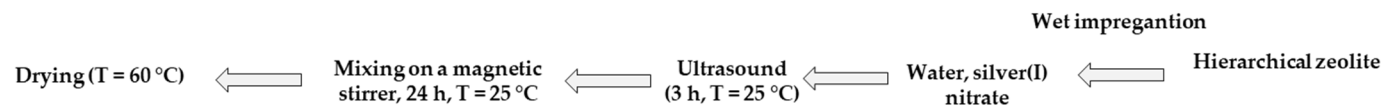

**Figure S15.** Synthesis of hierarchical zeolites based on FAU-type commercial zeolite modified with silver ions.

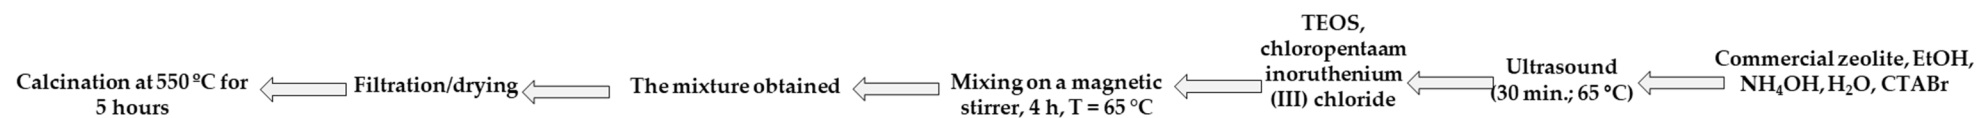

**Figure S16.** Synthesis of hierarchical zeolites based on FAU-type commercial zeolite modified with ruthenium ions.

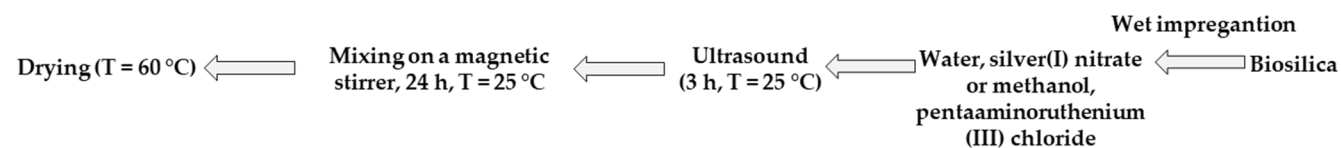

**Figure S17.** Synthesis of biosilica modified with silver ions or ruthenium ions.

## Emission spectra of monochromatic light sources

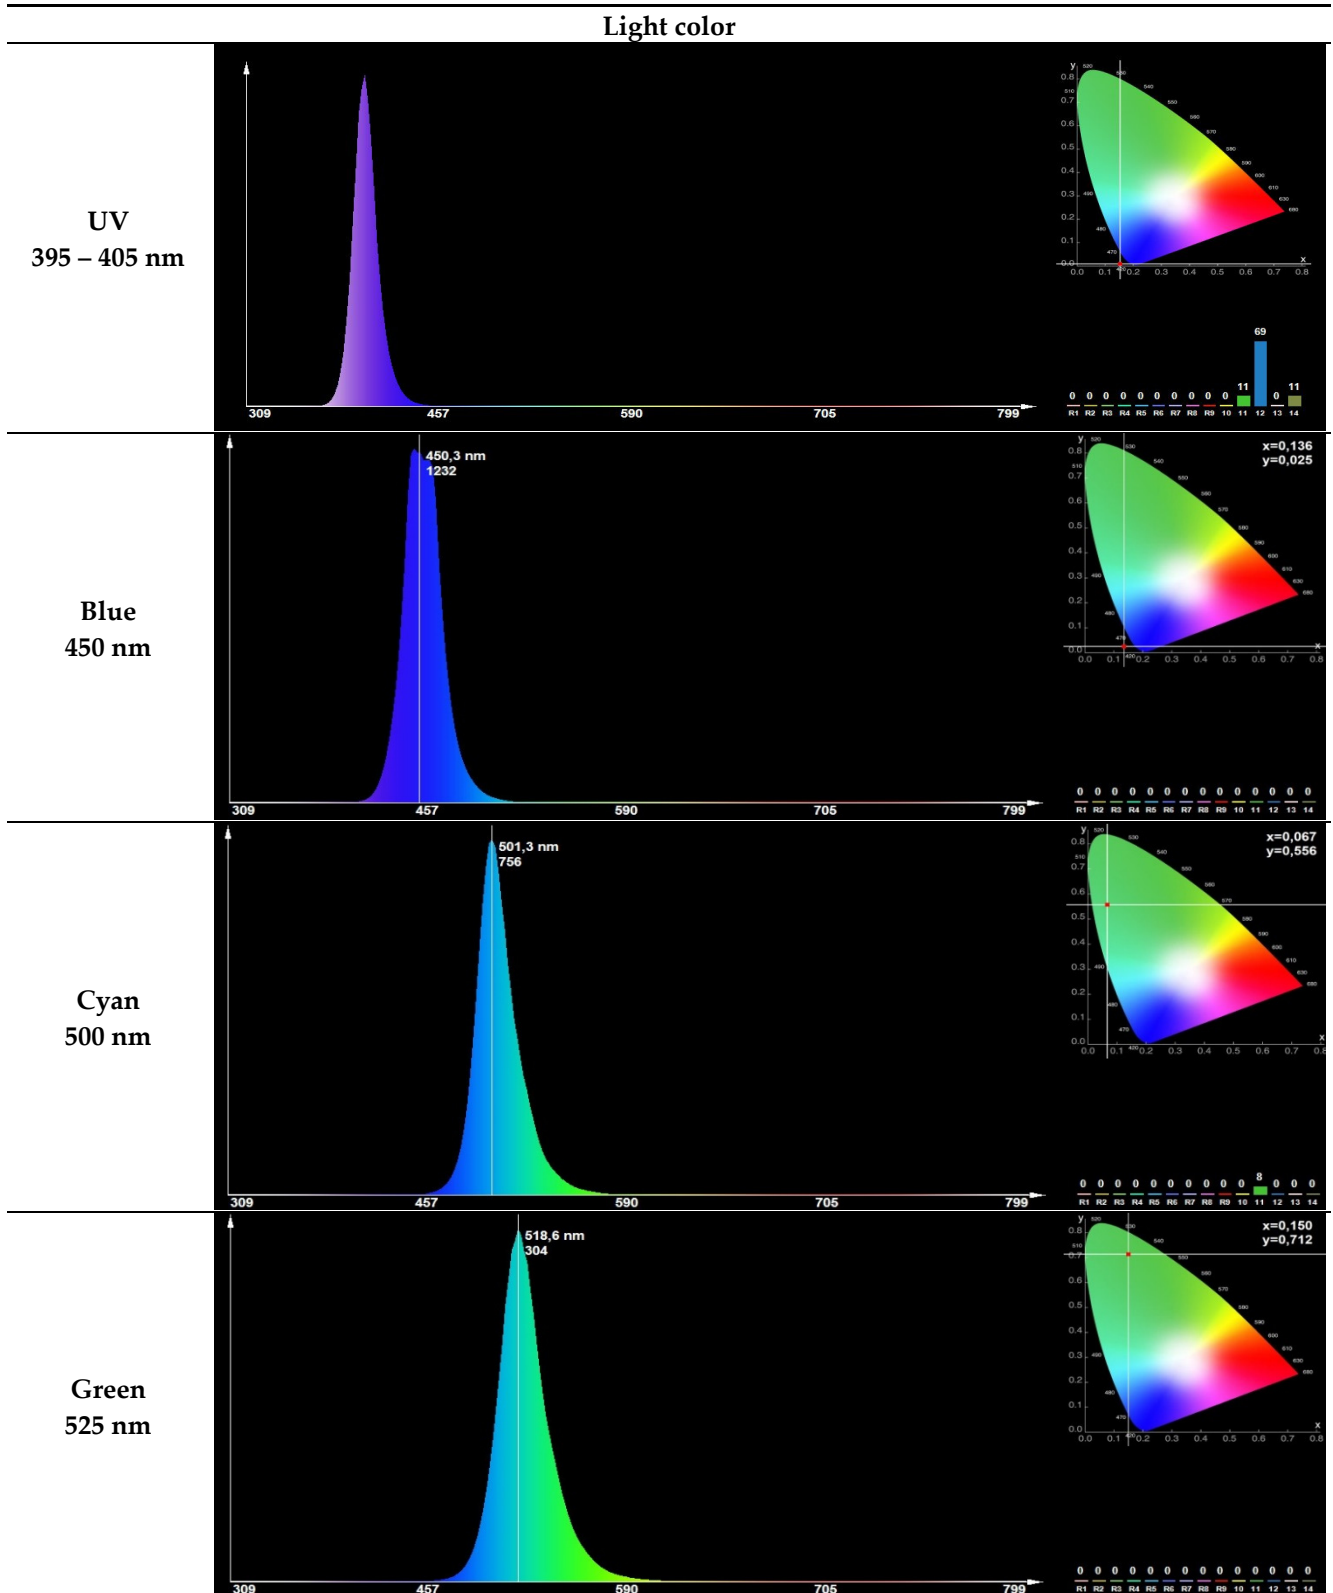

Yellow  
595 nm

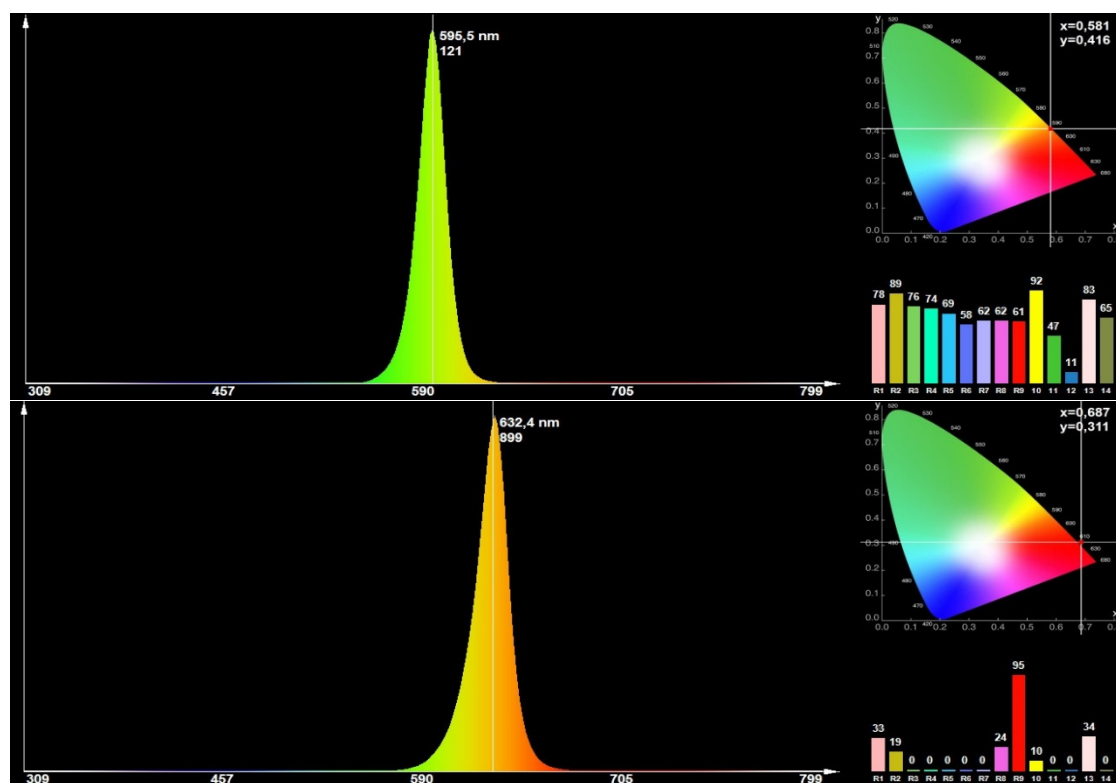

Figure S18. Emission spectra of monochromatic light sources - based on LED distributor data.
